# Supplementary material for: Emergence of SARS-CoV-2 Delta Variant, Benin, May–July 2021
Source: PubMed Central journal article supplement (PMC8714210; doi:10.3201/eid2801.211909), 2022-01
Supplement: 21-1909-Techapp-s1.pdf [file 21-1909-Techapp-s1.pdf]

# Emergence of SARS-CoV-2 Delta Variant, Benin, May–July 2021

## Appendix

**Appendix Table 1.** GISAID accession numbers of SARS-CoV-2 genomes sequenced during a surveillance study of virus variants, Benin, 2021\*

| Sample collection dates | No. sequenced | GISAID accession nos.†                                                                                                                                                                                                                                                                                                                                                                                                                                                                                                                                                                                                                                                                                                                                                                                                                                                                                                                                                                                                                                                                                                                                                                                                                                                                                                                                                                                                                                                                                                                                                                                                                                                                                                                                                                                                                                                                                                                                                                                           |
|-------------------------|---------------|------------------------------------------------------------------------------------------------------------------------------------------------------------------------------------------------------------------------------------------------------------------------------------------------------------------------------------------------------------------------------------------------------------------------------------------------------------------------------------------------------------------------------------------------------------------------------------------------------------------------------------------------------------------------------------------------------------------------------------------------------------------------------------------------------------------------------------------------------------------------------------------------------------------------------------------------------------------------------------------------------------------------------------------------------------------------------------------------------------------------------------------------------------------------------------------------------------------------------------------------------------------------------------------------------------------------------------------------------------------------------------------------------------------------------------------------------------------------------------------------------------------------------------------------------------------------------------------------------------------------------------------------------------------------------------------------------------------------------------------------------------------------------------------------------------------------------------------------------------------------------------------------------------------------------------------------------------------------------------------------------------------|
| January–March           | 90            | EPI_ISL_4567011, EPI_ISL_4567013, EPI_ISL_4567015, EPI_ISL_4567016, EPI_ISL_4567018, EPI_ISL_4567020, EPI_ISL_4567022, EPI_ISL_4567023, EPI_ISL_4567025, EPI_ISL_4567027, EPI_ISL_4567029, EPI_ISL_4567031, EPI_ISL_4567032, EPI_ISL_4567034, EPI_ISL_4567036, EPI_ISL_4567038, EPI_ISL_4567039, EPI_ISL_4567041, EPI_ISL_4567043, EPI_ISL_4567045, EPI_ISL_4567046, EPI_ISL_4567048, EPI_ISL_4567050, EPI_ISL_4567052, EPI_ISL_4567054, EPI_ISL_4567056, EPI_ISL_4567058, EPI_ISL_4567059, EPI_ISL_4567061, EPI_ISL_4567063, EPI_ISL_4567065, EPI_ISL_4567067, EPI_ISL_4567069, EPI_ISL_4567071, EPI_ISL_4567072, EPI_ISL_4567074, EPI_ISL_4567076, EPI_ISL_4567078, EPI_ISL_4567080, EPI_ISL_4567081, EPI_ISL_4567083, EPI_ISL_4567085, EPI_ISL_4567087, EPI_ISL_4567089, EPI_ISL_4567090, EPI_ISL_4567092, EPI_ISL_4567094, EPI_ISL_4567096, EPI_ISL_4567098, EPI_ISL_4567099, EPI_ISL_4567101, EPI_ISL_4567103, EPI_ISL_4567105, EPI_ISL_4567107, EPI_ISL_4567108, EPI_ISL_4567110, EPI_ISL_4567112, EPI_ISL_4567114, EPI_ISL_4567116, EPI_ISL_4567118, EPI_ISL_4567120, EPI_ISL_4567122, EPI_ISL_4567124, EPI_ISL_4567126, EPI_ISL_4567128, EPI_ISL_4567130, EPI_ISL_4567132, EPI_ISL_4567133, EPI_ISL_4567135, EPI_ISL_4567137, EPI_ISL_4567139, EPI_ISL_4567141, EPI_ISL_4567143, EPI_ISL_4567144, EPI_ISL_4567146, EPI_ISL_4567148, EPI_ISL_4567150, EPI_ISL_4567152, EPI_ISL_4567153, EPI_ISL_4567155, EPI_ISL_4567157, EPI_ISL_4567158, EPI_ISL_4567160, EPI_ISL_4567162, EPI_ISL_4567164, EPI_ISL_4567166, EPI_ISL_4567168, EPI_ISL_4567169                                                                                                                                                                                                                                                                                                                                                                                                                                                           |
| April–July              | 114           | EPI_ISL_4566811, EPI_ISL_4566813, EPI_ISL_4566814, EPI_ISL_4566816, EPI_ISL_4566818, EPI_ISL_4566820, EPI_ISL_4566821, EPI_ISL_4566823, EPI_ISL_4566825, EPI_ISL_4566827, EPI_ISL_4566829, EPI_ISL_4566830, EPI_ISL_4566832, EPI_ISL_4566834, EPI_ISL_4566836, EPI_ISL_4566837, EPI_ISL_4566839, EPI_ISL_4566841, EPI_ISL_4566843, EPI_ISL_4566845, EPI_ISL_4566846, EPI_ISL_4566848, EPI_ISL_4566850, EPI_ISL_4566852, EPI_ISL_4566854, EPI_ISL_4566855, EPI_ISL_4566857, EPI_ISL_4566859, EPI_ISL_4566861, EPI_ISL_4566863, EPI_ISL_4566865, EPI_ISL_4566867, EPI_ISL_4566869, EPI_ISL_4566871, EPI_ISL_4566872, EPI_ISL_4566874, EPI_ISL_4566876, EPI_ISL_4566878, EPI_ISL_4566880, EPI_ISL_4566882, EPI_ISL_4566883, EPI_ISL_4566885, EPI_ISL_4566887, EPI_ISL_4566889, EPI_ISL_4566891, EPI_ISL_4566893, EPI_ISL_4566894, EPI_ISL_4566896, EPI_ISL_4566898, EPI_ISL_4566900, EPI_ISL_4566901, EPI_ISL_4566903, EPI_ISL_4566905, EPI_ISL_4566907, EPI_ISL_4566908, EPI_ISL_4566910, EPI_ISL_4566912, EPI_ISL_4566914, EPI_ISL_4566915, EPI_ISL_4566917, EPI_ISL_4566919, EPI_ISL_4566921, EPI_ISL_4566922, EPI_ISL_4566924, EPI_ISL_4566926, EPI_ISL_4566928, EPI_ISL_4566929, EPI_ISL_4566931, EPI_ISL_4566933, EPI_ISL_4566935, EPI_ISL_4566936, EPI_ISL_4566938, EPI_ISL_4566940, EPI_ISL_4566942, EPI_ISL_4566943, EPI_ISL_4566945, EPI_ISL_4566947, EPI_ISL_4566949, EPI_ISL_4566950, EPI_ISL_4566952, EPI_ISL_4566954, EPI_ISL_4566956, EPI_ISL_4566958, EPI_ISL_4566959, EPI_ISL_4566961, EPI_ISL_4566963, EPI_ISL_4566964, EPI_ISL_4566966, EPI_ISL_4566968, EPI_ISL_4566970, EPI_ISL_4566971, EPI_ISL_4566973, EPI_ISL_4566975, EPI_ISL_4566977, EPI_ISL_4566978, EPI_ISL_4566980, EPI_ISL_4566982, EPI_ISL_4566984, EPI_ISL_4566985, EPI_ISL_4566987, EPI_ISL_4566989, EPI_ISL_4566990, EPI_ISL_4566992, EPI_ISL_4566994, EPI_ISL_4566996, EPI_ISL_4566997, EPI_ISL_4566999, EPI_ISL_4567001, EPI_ISL_4567002, EPI_ISL_4567004, EPI_ISL_4567006, EPI_ISL_4567008, EPI_ISL_4567009, EPI_ISL_4572438 |

\*SARS-CoV-2, severe acute respiratory syndrome coronavirus 2.

†GISAID, <https://www.gisaid.org>.

**Appendix Table 2.** Designated lineages, number of samples, and sample location and dates of 114 detected SARS-CoV-2 genomes, Benin, May–July 2021\*

| Lineage   | WHO label        | No. samples | Alias        | All locations detected    | Earliest sample |            |
|-----------|------------------|-------------|--------------|---------------------------|-----------------|------------|
|           |                  |             |              |                           | Date collected  | Location   |
| B.1.1.318 | NA               | 50          | NA           | Cotonou, Come, Grand-Popo | 28.04.2021      | Grand-Popo |
| B.1.617.2 | Delta            | 38          | NA           | Cotonou, Come, Lokossa    | 27.05.2021      | Cotonou    |
| AY.4      | Delta sublineage | 9           | B.1.617.2.4  | Cotonou                   | 24.06.2021      | Cotonou    |
| B.1.525   | NA               | 5           | NA           | Cotonou, Grand-Popo       | 12.05.2021      | Grand-Popo |
| B.1.1.7   | Alpha            | 3           | NA           | Cotonou                   | 27.05.2021      | Cotonou    |
| C.36.3    | NA               | 3           | B.1.1.1.36.3 | Cotonou                   | 24.05.2021      | Cotonou    |
| AV.1      | NA               | 1           | NA           | Cotonou                   | 05.07.2021      | Cotonou    |
| AZ.2      | NA               | 1           | NA           | Cotonou                   | 14.06.2021      | Cotonou    |
| B.1       | NA               | 1           | NA           | Cotonou                   | 27.05.2021      | Cotonou    |
| B.1.1.1   | NA               | 1           | NA           | Cotonou                   | 23.05.2021      | Cotonou    |
| B.1.351   | Beta             | 1           | NA           | Cotonou                   | 23.05.2021      | Cotonou    |
| B.1.620   | NA               | 1           | NA           | Cotonou                   | 25.05.2021      | Cotonou    |

\*NA, not applicable; SARS-CoV-2, severe acute respiratory syndrome coronavirus 2; WHO, World Health Organization.

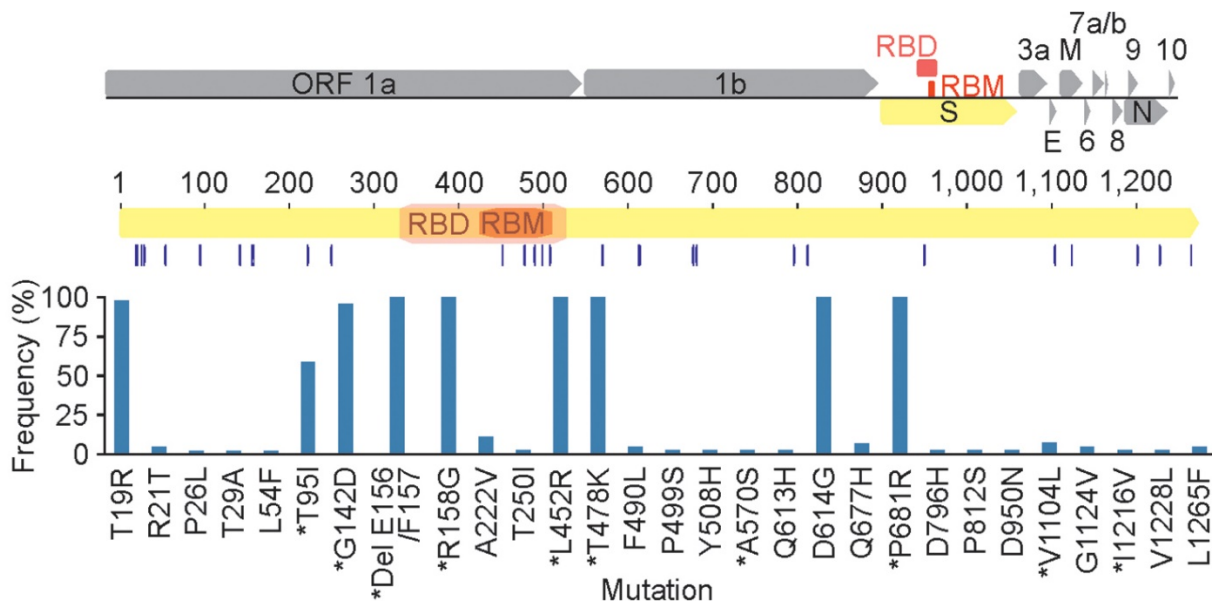

**Appendix Figure 1.** Nonsynonymous substitutions within the spike protein occurring within 47 SARS-CoV-2 Delta variant genomes sampled, Benin, May–July 2021. For clarity, a SARS-CoV-2 full genome illustration is included at the top. Asterisks (\*) indicate mutations for which genomic information was not available in all 47 Delta variant genomes, potentially due to assay failures or relatively lower DNA concentrations. Blue bars represent frequency of a given mutation in 46 genomes (for T95I, L452R, T478K, and P681R mutations); in 45 genomes (for A570S, V1140L, and I1216V mutations); and in 23 genomes (for G142D, Del E156/F157, and R158G mutations).

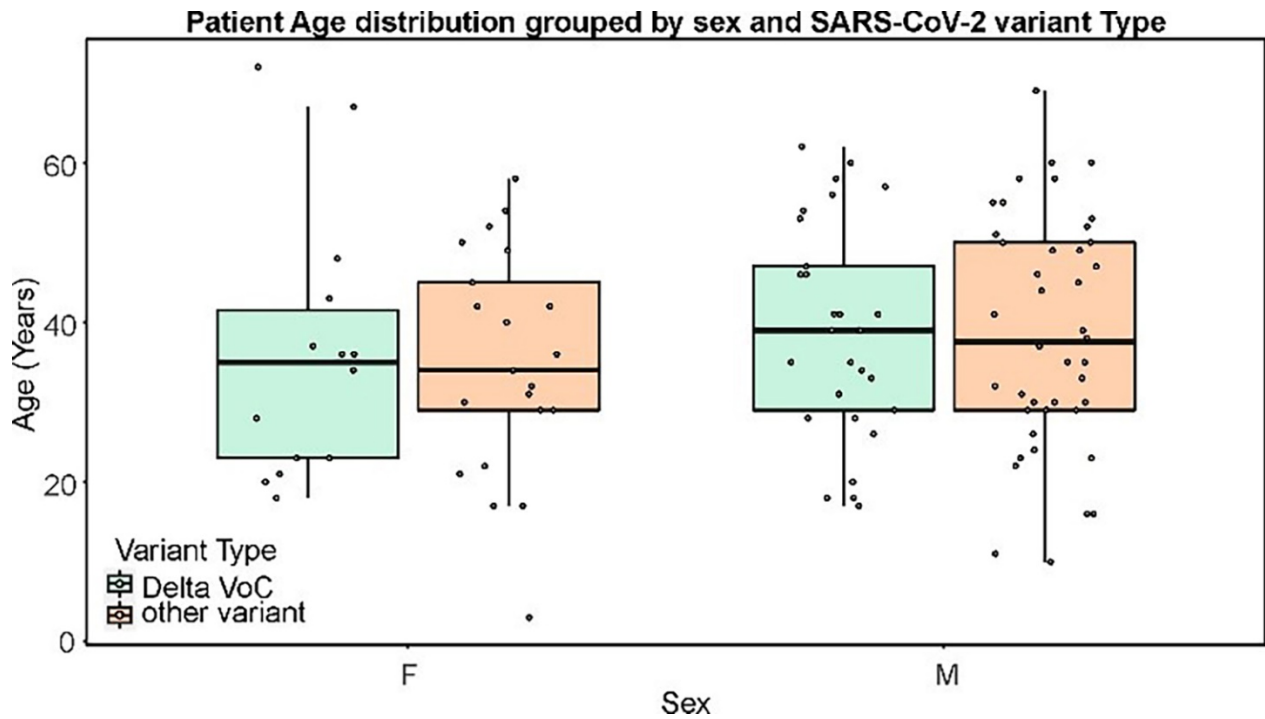

**Appendix Figure 2.** Patient age distribution grouped by sex and SARS-CoV-2 variant type, Benin, May–July 2021. Each point represents 1 patient. Box plots indicate interquartile range; whiskers represent the maximum and minimum values; horizontal line indicates the median. Plot was generated using the ggplot2 package in R (R Foundation for Statistical Computing, <https://www.r-project.org>).
